# Supplementary material
Source: MDPI journal article supplement (https://www.mdpi.com/2076-3905/4/4/647)
Supplement: s1 [file s1]

## Supplementary Information

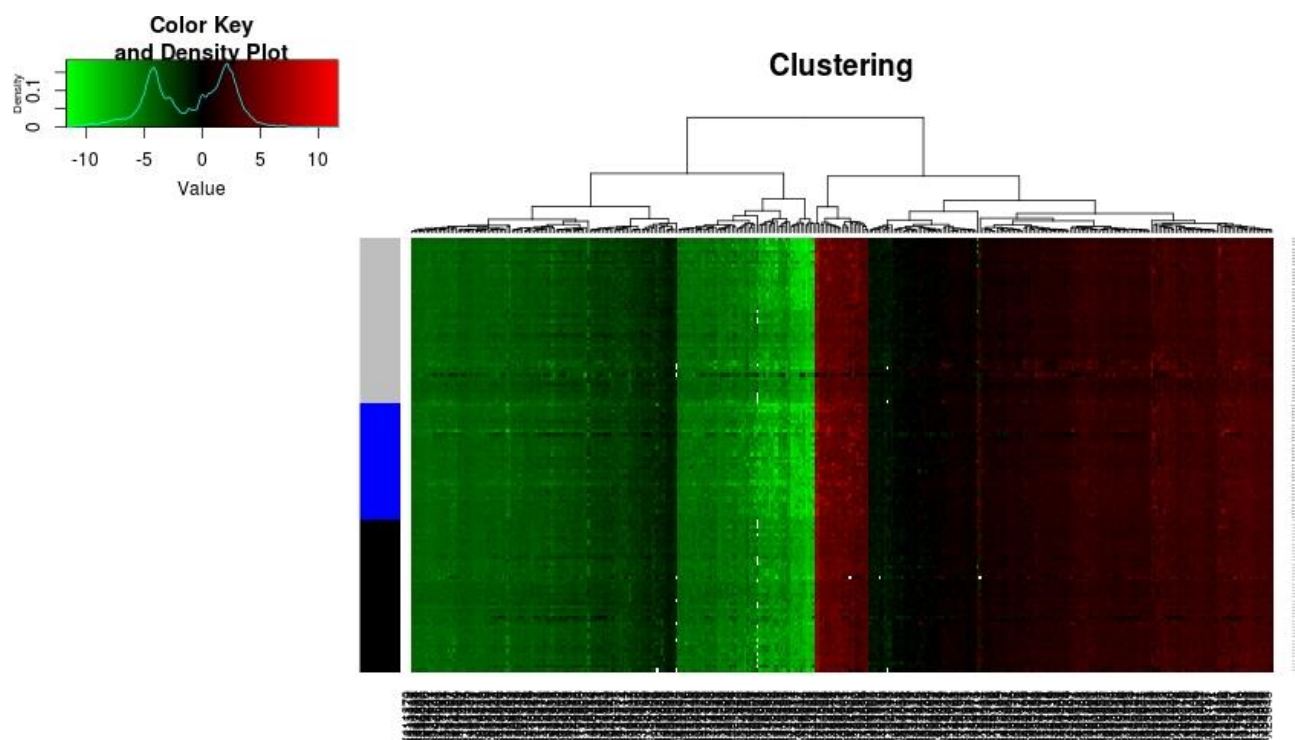

**Figure S1.** Cluster Analysis of Controls (gray), BCC A (blue) and LYCA (black) samples in the training set using the 352 CpG sites selected by GORvenge.

**Table S1.** Pre-Selection followed by Evolutionary Selection (up to 150 CpG sites) for the three-class problem (Controls vs. BCCA vs. LYCA) (142 selected CpG sites). Results using resampling (3-fold cross-validation for embedded 12-nn, leave-one-out for other classifiers).

| <i>Resampling</i>    | <b>Embedded 12-nn</b> | <b>1-nn</b> | <b>6-nn</b> | <b>12-nn</b> | <b>Tree</b> | <b>ANN</b> |
|----------------------|-----------------------|-------------|-------------|--------------|-------------|------------|
| Total Accuracy       | 79.39                 | 65.65       | 67.94       | 87.02        | 59.54       | 87.02      |
| Controls Sensitivity | 64.00                 | 62.00       | 58.00       | 84.00        | 48.00       | 84.00      |
| BCCA Sensitivity     | 88.57                 | 80.00       | 80.00       | 88.57        | 74.29       | 88.57      |
| LYCA Sensitivity     | 89.31                 | 58.70       | 69.57       | 89.13        | 60.87       | 89.13      |

**Table S2.** Pre-Selection followed by Evolutionary Selection (up 150 CpG sites) for the two-class problem (Controls vs. BCCA) (129 selected CpG sites). Results using resampling (3-fold cross-validation for embedded 12-nn, leave-one-out for other classifiers).

| <i>Resampling</i>    | <b>Embedded 12-nn</b> | <b>1-nn</b> | <b>6-nn</b> | <b>12-nn</b> | <b>Tree</b> | <b>ANN</b> |
|----------------------|-----------------------|-------------|-------------|--------------|-------------|------------|
| Total Accuracy       | 94.74                 | 82.46       | 82.46       | 84.21        | 73.68       | 85.96      |
| Controls Sensitivity | 86.36                 | 90.91       | 81.82       | 86.36        | 72.73       | 81.82      |
| BCCA Sensitivity     | 100                   | 77.14       | 82.86       | 82.86        | 74.29       | 88.57      |

**Table S3.** Pre-Selection followed by Evolutionary Selection (up 150 CpG sites) for the two-class problem (Controls vs. LYCA) (143 selected CpG sites). Results using resampling (3-fold cross-validation for embedded 12-nn, leave-one-out for other classifiers).

| <i>Resampling</i>    | <b>Embedded 12-nn</b> | <b>1-nn</b> | <b>6-nn</b> | <b>12-nn</b> | <b>Tree</b> | <b>ANN</b> |
|----------------------|-----------------------|-------------|-------------|--------------|-------------|------------|
| Total Accuracy       | 82.56                 | 48.65       | 64.86       | 71.62        | 60.81       | 78.38      |
| Controls Sensitivity | 67.86                 | 42.68       | 50          | 53.57        | 53.57       | 57.14      |
| BCCA Sensitivity     | 91.3                  | 52.17       | 73.91       | 82.61        | 65.22       | 91.3       |

**Table S4.** Pre-Selection followed by Evolutionary Selection (up 150 CpG sites) for the two-class problem (BCCA vs. LYCA) (146 selected CpG sites). Results using resampling (3-fold cross-validation for embedded 12-nn, leave-one-out for other classifiers).

| <i>Resampling</i> | <b>Embedded 12-nn</b> | <b>1-nn</b> | <b>6-nn</b> | <b>12-nn</b> | <b>Tree</b> | <b>ANN</b> |
|-------------------|-----------------------|-------------|-------------|--------------|-------------|------------|
| Total Accuracy    | 100                   | 98.77       | 97.53       | 98.77        | 100         | 100        |
| BCCA Sensitivity  | 100                   | 97.14       | 94.29       | 97.14        | 100         | 100        |
| LYCA Sensitivity  | 100                   | 100         | 100         | 100          | 100         | 100        |

**Table S5.** Pre-Selection followed by GOREvenge for the three-class problem (Controls vs. BCCA vs. LYCA) (352 selected CpG sites). Results using leave-one-out resampling.

| <i>Resampling</i>    | <b>1-nn</b> | <b>6-nn</b> | <b>12-nn</b> | <b>Tree</b> | <b>ANN</b> |
|----------------------|-------------|-------------|--------------|-------------|------------|
| Total Accuracy       | 52.67       | 56.49       | 64.89        | 54.20       | 78.63      |
| Controls Sensitivity | 50.00       | 46.00       | 44.00        | 40.00       | 70.00      |
| BCCA Sensitivity     | 60.00       | 62.86       | 74.29        | 57.14       | 91.43      |
| LYCA Sensitivity     | 50.00       | 63.04       | 80.43        | 67.39       | 78.26      |

**Table S6.** Pre-Selection followed by GoRevenge for the two-class problem (Controls vs. BCCA) (183 selected CpG sites). Results using leave-one-out resampling.

| <i>Resampling</i>    | <b>1-nn</b> | <b>6-nn</b> | <b>12-nn</b> | <b>Tree</b> | <b>ANN</b> |
|----------------------|-------------|-------------|--------------|-------------|------------|
| Total Accuracy       | 75.44       | 84.21       | 84.21        | 57.89       | 91.23      |
| Controls Sensitivity | 81.82       | 81.82       | 72.73        | 54.55       | 86.36      |
| BCCA Sensitivity     | 71.43       | 85.71       | 91.43        | 60.00       | 94.29      |

**Table S7.** Pre-Selection followed by GoRevenge for the two-class problem (Controls vs. LYCA) (35 selected CpG sites). Results using leave-one-out resampling.

| <i>Resampling</i>    | <b>1-nn</b> | <b>6-nn</b> | <b>12-nn</b> | <b>Tree</b> | <b>ANN</b> |
|----------------------|-------------|-------------|--------------|-------------|------------|
| Total Accuracy       | 58.11       | 58.11       | 63.51        | 60.81       | 66.22      |
| Controls Sensitivity | 39.29       | 39.29       | 35.71        | 42.86       | 53.57      |
| LYCA Sensitivity     | 69.57       | 69.57       | 90.43        | 71.44       | 73.91      |

**Table S8.** Pre-Selection followed by GOREvenge and Evolutionary Selection (up to 150 CpG sites) for the three-class problem (Controls vs. BCCA vs. LYCA) (141 selected CpG sites). Results using resampling (3-fold cross-validation for embedded 12-nn, leave-one-out for other classifiers).

| <i>Resampling</i>    | <b>Embedded 12-nn</b> | <b>1-nn</b> | <b>6-nn</b> | <b>12-nn</b> | <b>Tree</b> | <b>ANN</b> |
|----------------------|-----------------------|-------------|-------------|--------------|-------------|------------|
| Total Accuracy       | 76.27                 | 56.49       | 57.25       | 62.60        | 48.09       | 76.34      |
| Controls Sensitivity | 66.00                 | 54.00       | 48.00       | 46.00        | 30.00       | 68.00      |
| BCCA Sensitivity     | 74.29                 | 57.14       | 60.00       | 62.86        | 68.57       | 82.86      |
| LYCA Sensitivity     | 89.13                 | 58.70       | 65.22       | 80.43        | 52.17       | 88.43      |

**Table S9.** Pre-Selection followed by Evolutionary Selection (up to 400 CpG sites) for the three-class problem (Controls vs. BCCA vs. LYCA) (373 selected CpG sites). Results using resampling (3-fold cross-validation for embedded 12-nn, leave-one-out for other classifiers).

| <i>Resampling</i>    | <b>Embedded 12-nn</b> | <b>1-nn</b> | <b>6-nn</b> | <b>12-nn</b> | <b>Tree</b> | <b>ANN</b> |
|----------------------|-----------------------|-------------|-------------|--------------|-------------|------------|
| Total Accuracy       | 64.83                 | 64.12       | 70.23       | 68.70        | 54.20       | 77.86      |
| Controls Sensitivity | 40.00                 | 66.00       | 64.00       | 52.00        | 40.00       | 68.00      |
| BCCA Sensitivity     | 68.57                 | 62.86       | 77.14       | 80.00        | 62.86       | 94.29      |
| LYCA Sensitivity     | 89.13                 | 63.04       | 71.74       | 78.26        | 63.04       | 76.09      |
